# Supplementary material for: Protection against Mycobacterium tuberculosis Infection Offered by a New Multistage Subunit Vaccine Correlates with Increased Number of IFN-γ+IL-2+ CD4+ and IFN-γ+ CD8+ T Cells
Source: PLoS One. 2015 Mar 30;10(3):e0122560. doi: 10.1371/journal.pone.0122560 (PMC4378938; doi:10.1371/journal.pone.0122560)
Supplement: S2 Table — (XLS) [file pone.0122560.s003.xls]

## Sheet: S2_dataset
Groups	TB patients	LTBIs	Healthy controls
Clinical diagnosis	Clinical symptoms, positive sputum smear microscopy, aberrant lung X-ray and TST≥5mm	Household contact with sputum positive TB patients in recent six months, no clinical symptom, no abnormal chest radiograph, and TST≥5mm	Healthy, no prior contact or exposure history to TB, and TST<5mm
rCM-WBIA	Positive	Positive	Negative
Number of subjects	10	17	15
Mean age	44.9	31.6	38.9
Range of age	22-70	19-65	17-67
Male/female	7/3	9/8	8/7
